# Supplementary material for: Enhancement of the electrochemical oxygen reduction performance by surface oxygen vacancies on hematite nanosheets
Source: Royal Society of Chemistry journal article supplement (doi:10.1039/d3nj03398h), 2023-01-01
Supplement: d3nj03398h1.pdf [file d3nj03398h1.pdf]

## Supporting Information

# The Regulation of Electrochemical Oxygen Reduction Performance by Surface Oxygen Vacancies on Hematite Nanosheets

Gongxu Lan,<sup>a</sup> Huilin Fan,<sup>a</sup> Yuan Wang,<sup>b</sup> Hamidreza Arandiyani,<sup>c,d,\*</sup> Suresh K. Bhargava,<sup>d</sup> Zongping Shao,<sup>e</sup> Hongyu Sun,<sup>f,\*</sup> Yanguo Liu <sup>a,f,g,\*</sup>

<sup>a</sup> School of Materials Science and Engineering, Northeastern University, Shenyang 110004, PR China

<sup>b</sup> Institute for Frontier Materials, Deakin University, Melbourne, Vic 3125, Australia

<sup>c</sup> Laboratory of Advanced Catalysis for Sustainability, School of Chemistry, University of Sydney, Sydney, NSW 2006, Australia

<sup>d</sup> Centre for Applied Materials and Industrial Chemistry (CAMIC), School of Science, RMIT University, Melbourne, Vic 3000, Australia

<sup>e</sup> WA School of Mines: Minerals, Energy and Chemical Engineering, Curtin University, Perth, WA, 6845, Australia

<sup>f</sup> School of Resources and Materials, Northeastern University at Qinhuangdao, Qinhuangdao 066004, PR China

<sup>g</sup> Key Laboratory of Dielectric and Electrolyte Functional Material Hebei Province, Northeastern University at Qinhuangdao, Qinhuangdao 066004, PR China

\* Corresponding author E-mail addresses: [hamid.arandiyani@sydney.edu.au](mailto:hamid.arandiyani@sydney.edu.au) (H. Arandiyani), [hyltsun@gmail.com](mailto:hyltsun@gmail.com) (H. Sun), [lyg@neuq.edu.cn](mailto:lyg@neuq.edu.cn) (Y. Liu)

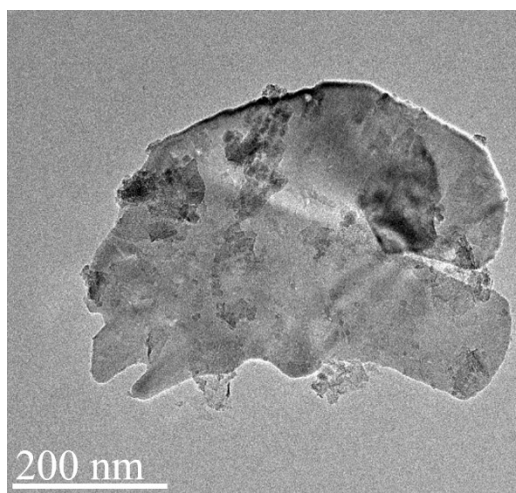

Fig. S1 TEM image of  $\alpha$ -Fe<sub>2</sub>O<sub>3</sub>-1M.

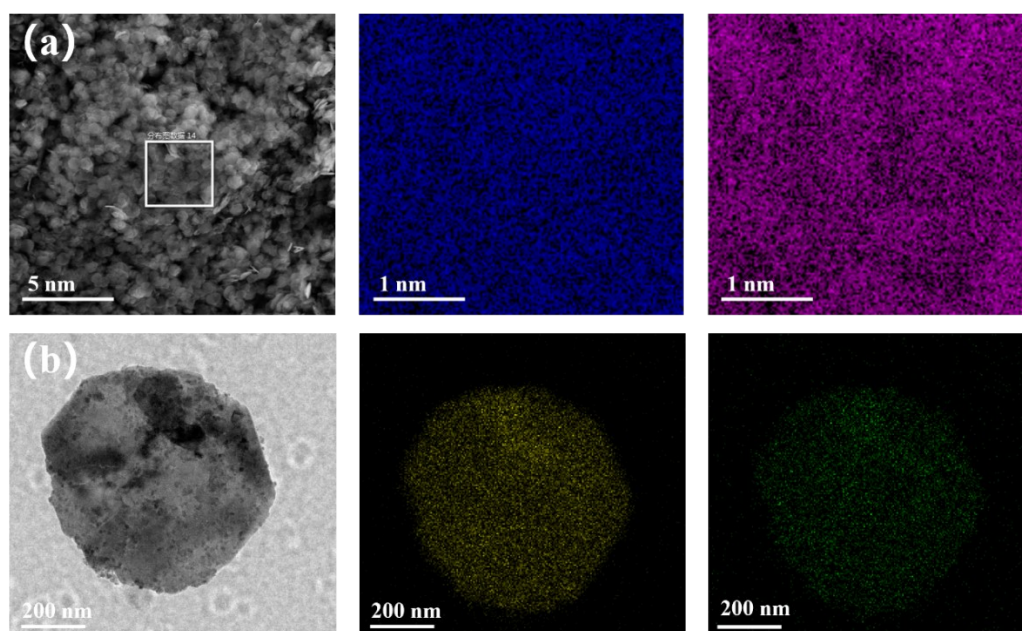

Fig. S2  $\alpha$ -Fe<sub>2</sub>O<sub>3</sub>-1M mapping of SEM(a) and TEM(b)

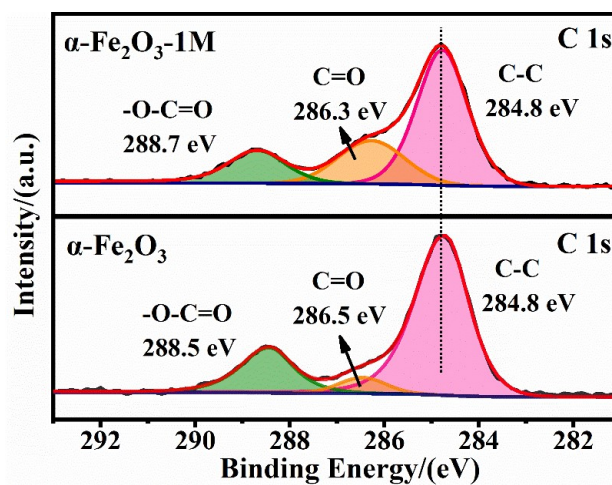

Fig. S3 High-resolution XPS spectra of C 1s core levels for the as-prepared  $\alpha$ -Fe<sub>2</sub>O<sub>3</sub> and  $\alpha$ -Fe<sub>2</sub>O<sub>3</sub>-1 samples.

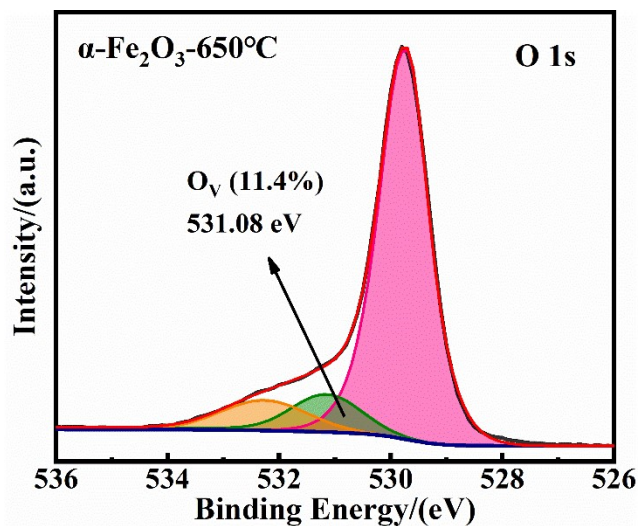

**Fig. S4** O1s high-resolution XPS spectra of  $\alpha\text{-Fe}_2\text{O}_3\text{-650}^\circ\text{C}$ .

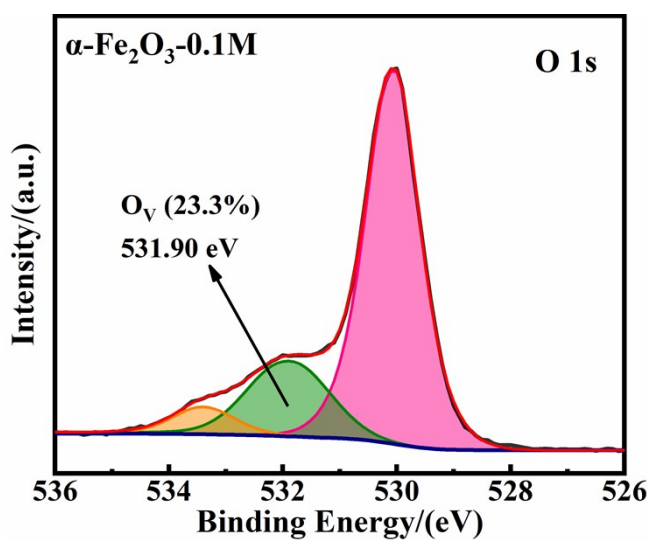

**Fig. S5** O1s high-resolution XPS spectra of  $\alpha\text{-Fe}_2\text{O}_3\text{-0.1M}$ .

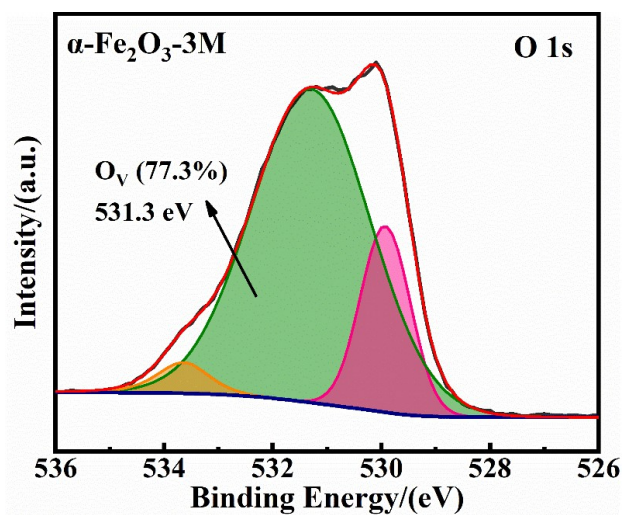

**Figure S5**

**Fig. S6** O1s high-resolution XPS spectra of  $\alpha\text{-Fe}_2\text{O}_3\text{-3M}$ .

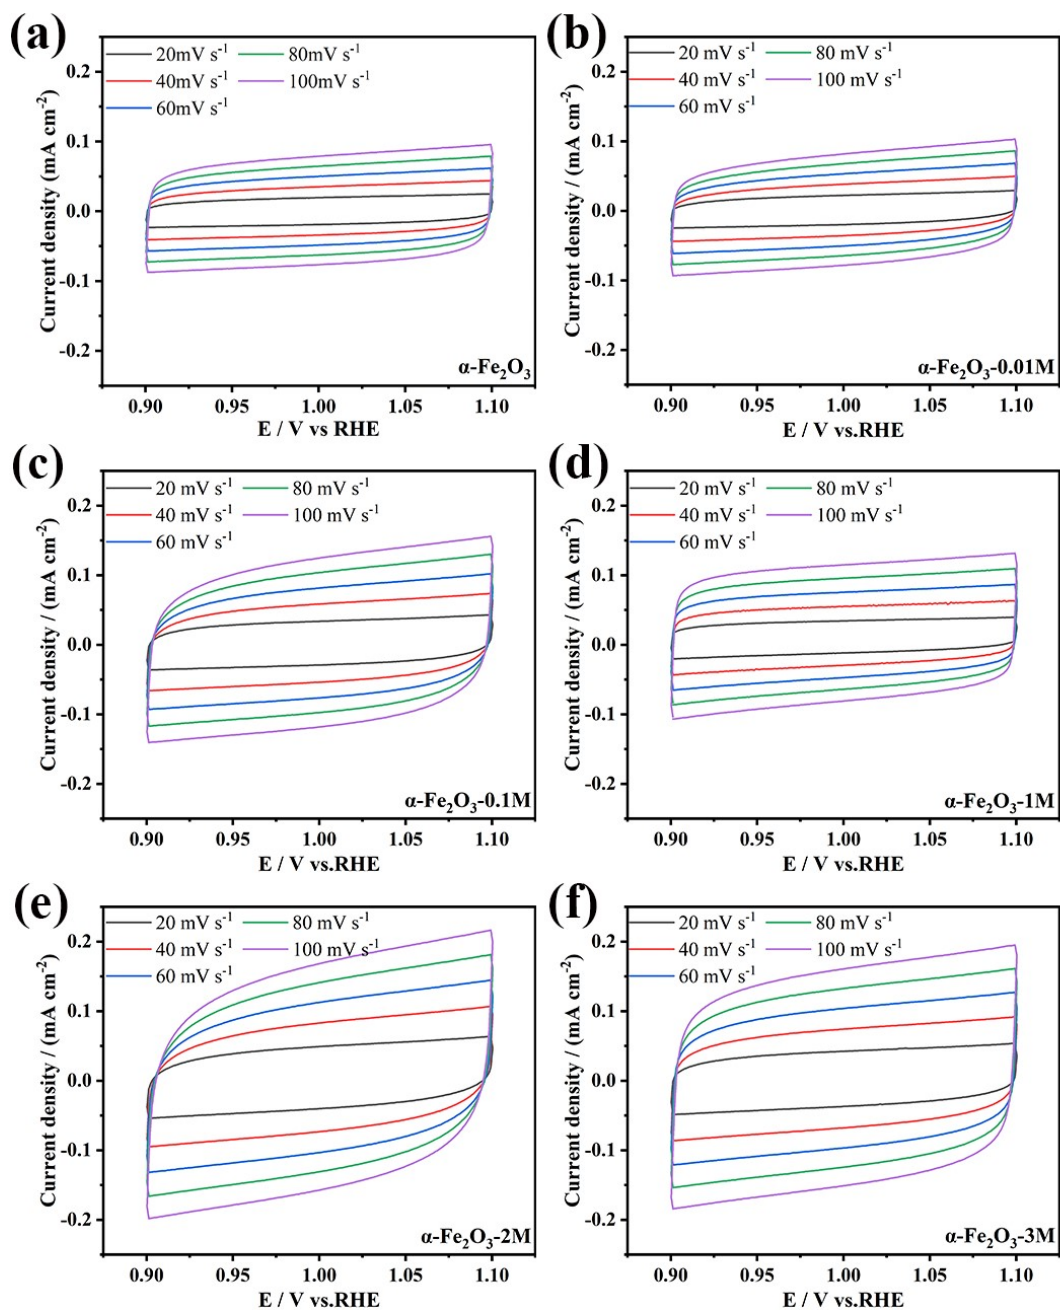

**Fig. S7** CV curves of (a)  $\alpha\text{-Fe}_2\text{O}_3$  nanosheets, (b)  $\alpha\text{-Fe}_2\text{O}_3\text{-0.01M}$ , (c)  $\alpha\text{-Fe}_2\text{O}_3\text{-0.1M}$ , (d)  $\alpha\text{-Fe}_2\text{O}_3\text{-1M}$ , (e)  $\alpha\text{-Fe}_2\text{O}_3\text{-2M}$  and (f)  $\alpha\text{-Fe}_2\text{O}_3\text{-3M}$  at different scan rates.

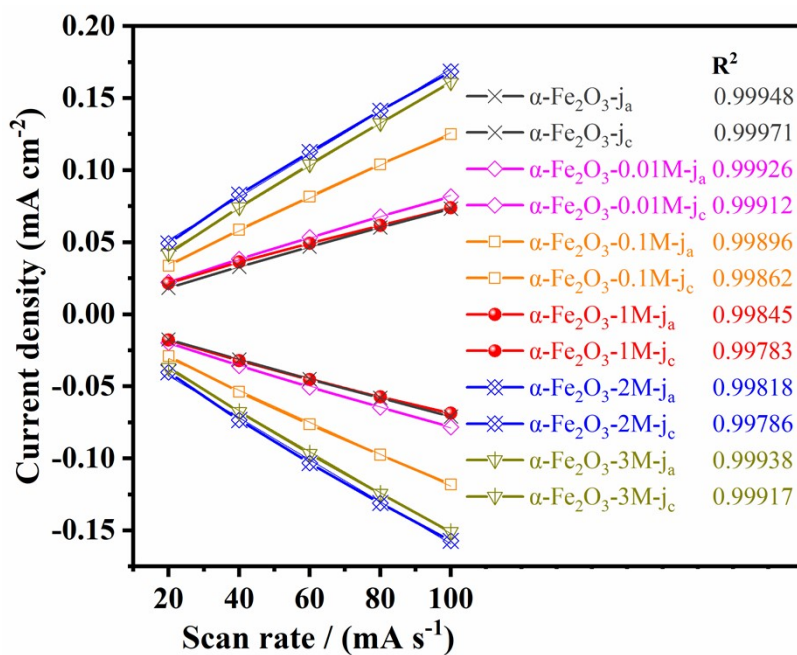

**Fig. S8** Anodic and cathodic current densities (denoted as  $j_a$  and  $j_c$ , respectively) as a function of scan rate for iron oxide samples at a potential of 1.0 V vs.RHE.

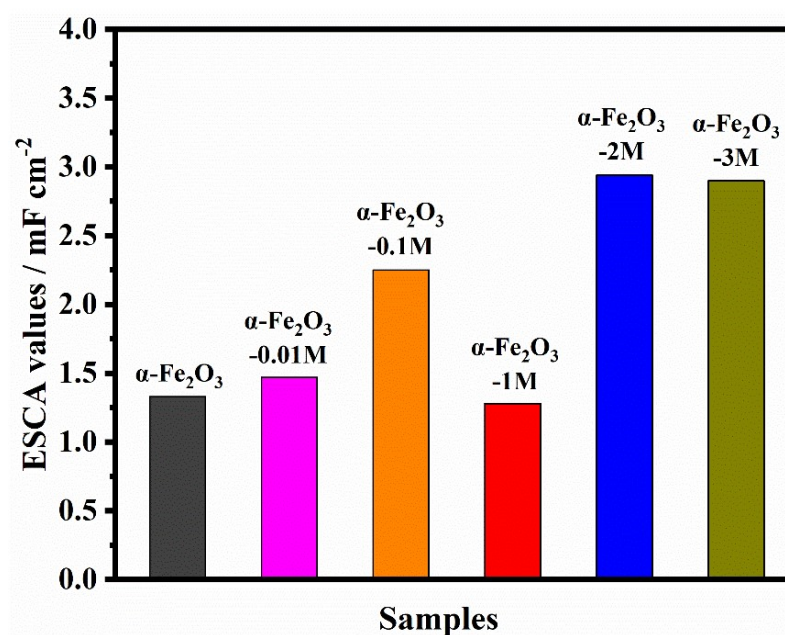

**Fig. S9** The ECSA value of electrocatalysts was judged by twice the double-layer capacitance.

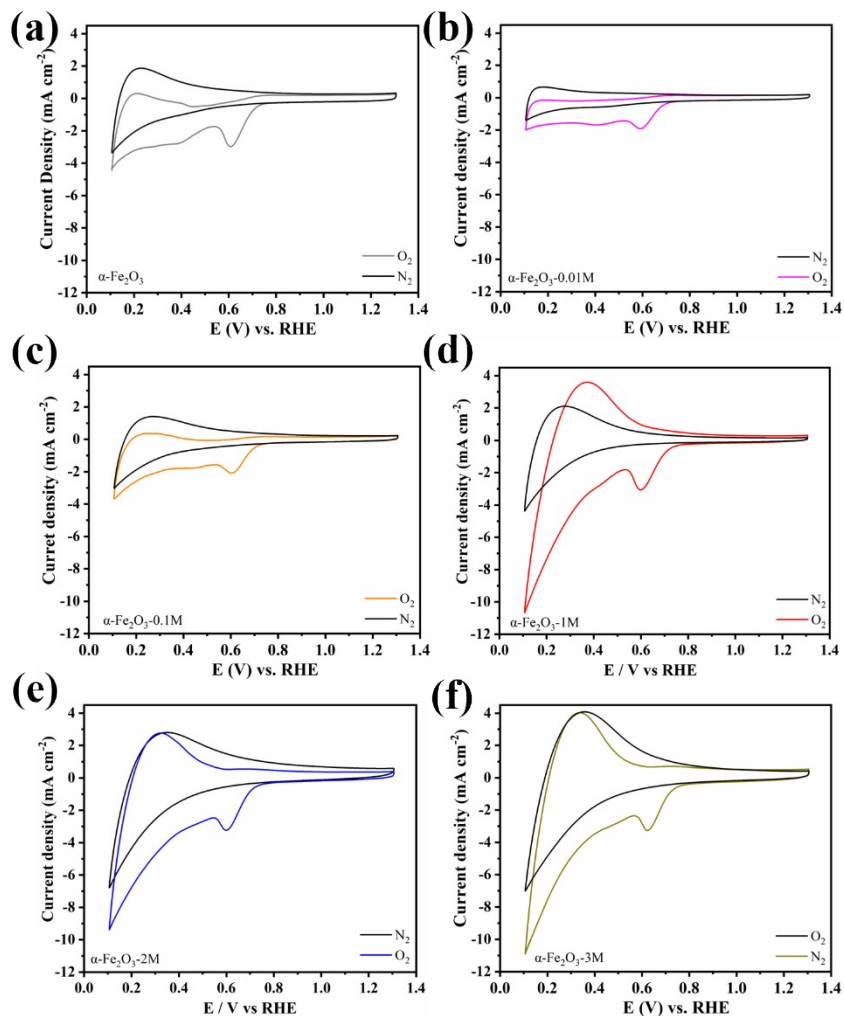

**Fig. S10** CV curves of (a)  $\alpha\text{-Fe}_2\text{O}_3$  nanosheets, (b)  $\alpha\text{-Fe}_2\text{O}_3\text{-}0.01\text{M}$ , (c)  $\alpha\text{-Fe}_2\text{O}_3\text{-}0.1\text{M}$ , (d)  $\alpha\text{-Fe}_2\text{O}_3\text{-}1\text{M}$ , (e)  $\alpha\text{-Fe}_2\text{O}_3\text{-}2\text{M}$  and (f)  $\alpha\text{-Fe}_2\text{O}_3\text{-}3\text{M}$  under different atmospheres.

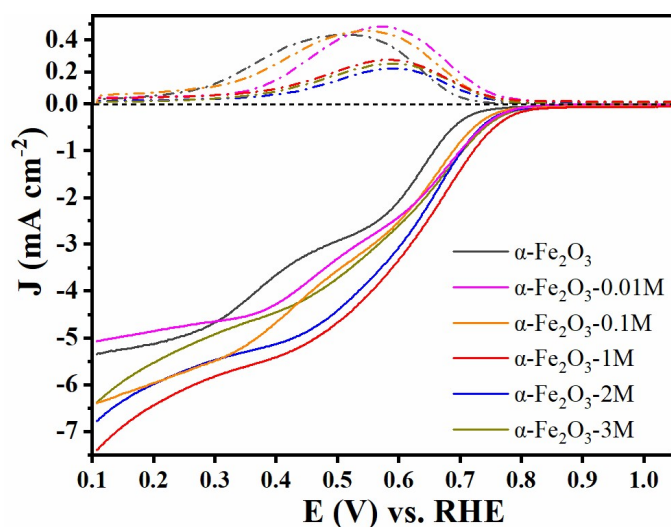

**Fig. S11** LSV curves of RRDE at 1600 r.p.m. in 0.1 M KOH solution.

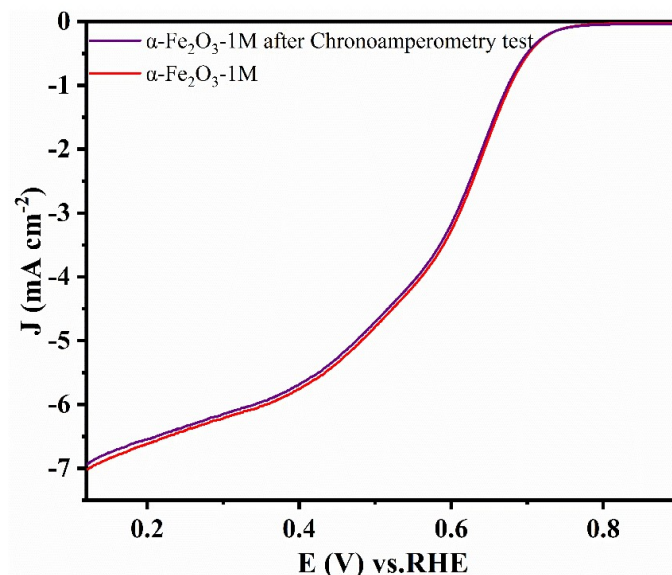

**Fig. S12** Comparison of LSV curves of  $\alpha$ -Fe<sub>2</sub>O<sub>3</sub>-1M catalysts before and after testing by Chronoamperometry

**Table S1** The simulated element values of the fitted equivalent circuit of the EIS spectrum.

|                 | $\alpha$ -Fe <sub>2</sub> O <sub>3</sub> | $\alpha$ -Fe <sub>2</sub> O <sub>3</sub> -1M | $\alpha$ -Fe <sub>2</sub> O <sub>3</sub> -2M |
|-----------------|------------------------------------------|----------------------------------------------|----------------------------------------------|
| $R_s/\Omega$    | 49.14                                    | 54.41                                        | 40                                           |
| $R_{ct}/\Omega$ | 1760                                     | 611.3                                        | 2459                                         |

**Table S2** Activity comparison of iron oxide materials for electrocatalytic oxygen reduction process in 0.1 M KOH electrolyte

| Catalysts                                                                | Current density at 0.4V vs. RHE (mA cm <sup>-2</sup> ) | ref       |
|--------------------------------------------------------------------------|--------------------------------------------------------|-----------|
| $\alpha$ -Fe <sub>2</sub> O <sub>3</sub> -O <sub>V</sub>                 | 5.75                                                   | this work |
| OMCs-Fe <sub>2</sub> O <sub>3</sub>                                      | 4.35                                                   | (S1)      |
| {012}-Fe <sub>2</sub> O <sub>3-x</sub>                                   | 3.20                                                   | (S2)      |
| $\alpha$ -Fe <sub>2</sub> O <sub>3</sub> /N-CNTs                         | 3.82                                                   | (S3)      |
| $\alpha$ -Fe <sub>2</sub> O <sub>3</sub> /Fe <sub>3</sub> O <sub>4</sub> | 4.90                                                   | (S4)      |

## References

- S1. He J, Li B, Mao J, Liang Y, Yang X, Cui Z, et al. Four-electron oxygen reduction from mesoporous carbon modified with Fe<sub>2</sub>O<sub>3</sub> nanocrystals. *Journal of Materials Science*. 2017;52(18):10938-47.
- S2. Gao RJ, Pan L, Li ZW, Shi CX, Yao YD, Zhang XW, et al. Engineering Facets and Oxygen Vacancies over Hematite Single Crystal for Intensified Electrocatalytic H<sub>2</sub>O<sub>2</sub> Production. *Advanced Functional Materials*. 2020;30(24):1910539.
- S3. Sun M, Zhang G, Liu H, Liu Y, Li J.  $\alpha$ - and  $\gamma$ -Fe<sub>2</sub>O<sub>3</sub> nanoparticle/nitrogen doped carbon nanotube catalysts for high-performance oxygen reduction reaction. *Science China Materials*. 2015;58(9):683-92.
- S4. Wan H, Lv M, Liu X, Chen G, Zhang N, Cao Y, et al. Activating Hematite Nanoplates via Partial Reduction for Electrocatalytic Oxygen Reduction Reaction. *ACS Sustainable Chemistry & Engineering*. 2019;7(13):11841-9.
